# Supplementary material for: Fabrication of CuInS2/ZnS quantum dot nanocomposite films and investigation of their influence on performance of soda glass-based luminescent solar concentrators
Source: Royal Society of Chemistry journal article supplement (doi:10.1039/d4tc04797d), 2025-01-01
Supplement: d4tc04797d1.pdf [file d4tc04797d1.pdf]

## **Electronic Supplementary Information**

*Journal of Material Chemistry C*

# **Fabrication of CuInS<sub>2</sub>/ZnS quantum dot nanocomposite films and investigation of their influence on performance of soda glass-based luminescent solar concentrators**

Yu Imakiire, Yoshiki Iso,\* and Tetsuhiko Isobe\*

*Department of Applied Chemistry, Faculty of Science and Technology, Keio University,*

*3-14-1 Hiyoshi, Kohoku-ku, Yokohama 223-8522, Japan*

\*Corresponding Authors:

Yoshiki Iso – E-mail: iso@applc.keio.ac.jp; Tel.: +81 45 566 1558; Fax: +81 45 566

1551; orcid.org/0000-0001-7483-2828

Tetsuhiko Isobe – E-mail: isobe@applc.keio.ac.jp; Tel.: +81 45 566 1554; Fax: +81 45

566 1551; orcid.org/0000-0002-0868-5425

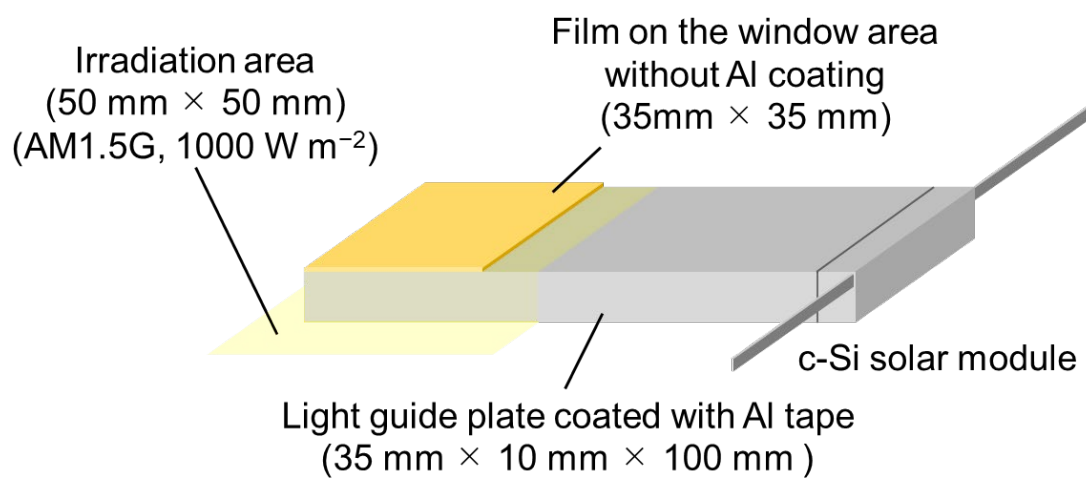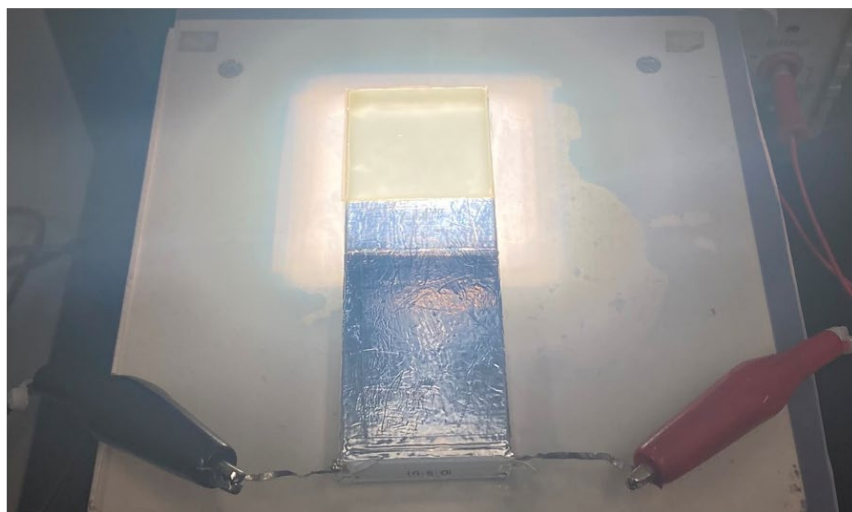

Fig. S1 Schematic illustration and photograph of the LSC with a nanocomposite film under the simulated solar light. With the exception of the window area, all areas are coated with aluminum tape.

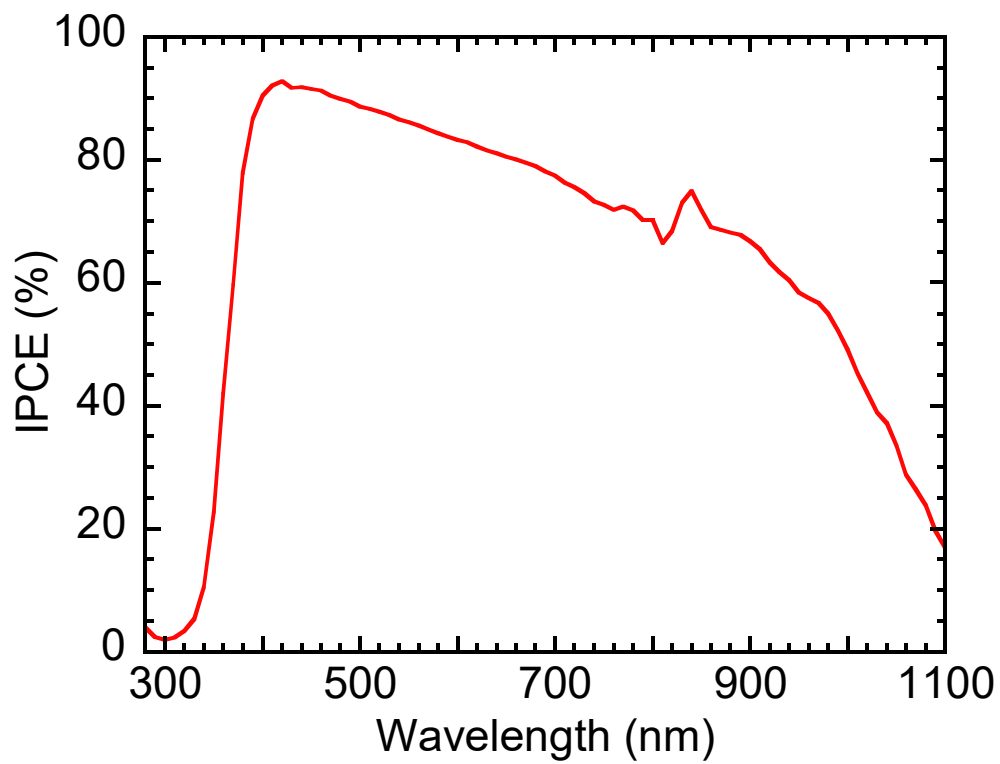

Fig. S2 Original IPCE spectrum of the c-Si solar module.

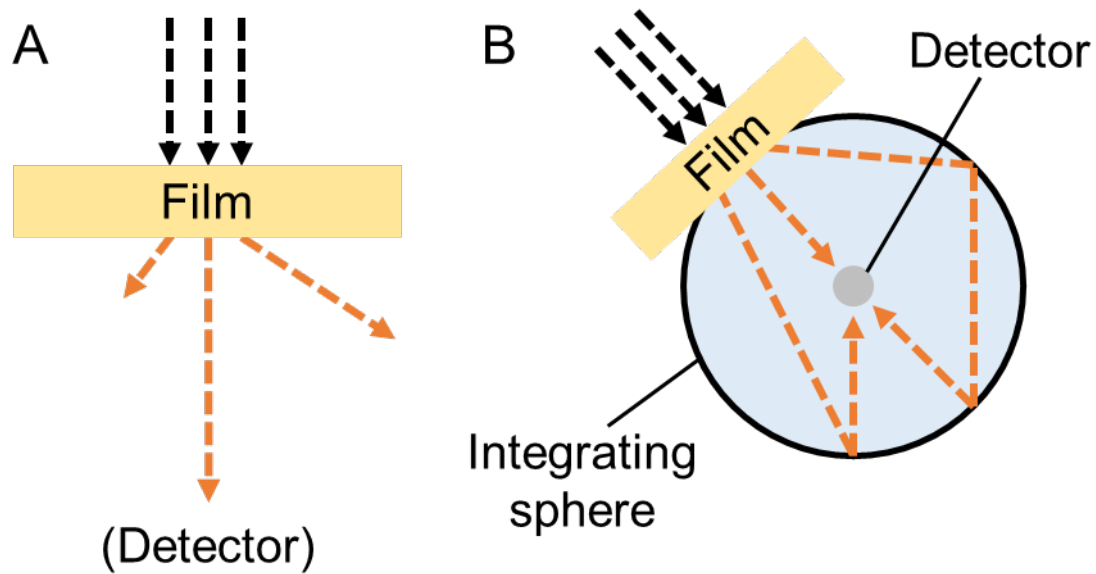

Fig. S3 Illustration of the measurements of (A) in-line and (B) total transmission spectra for the film samples.

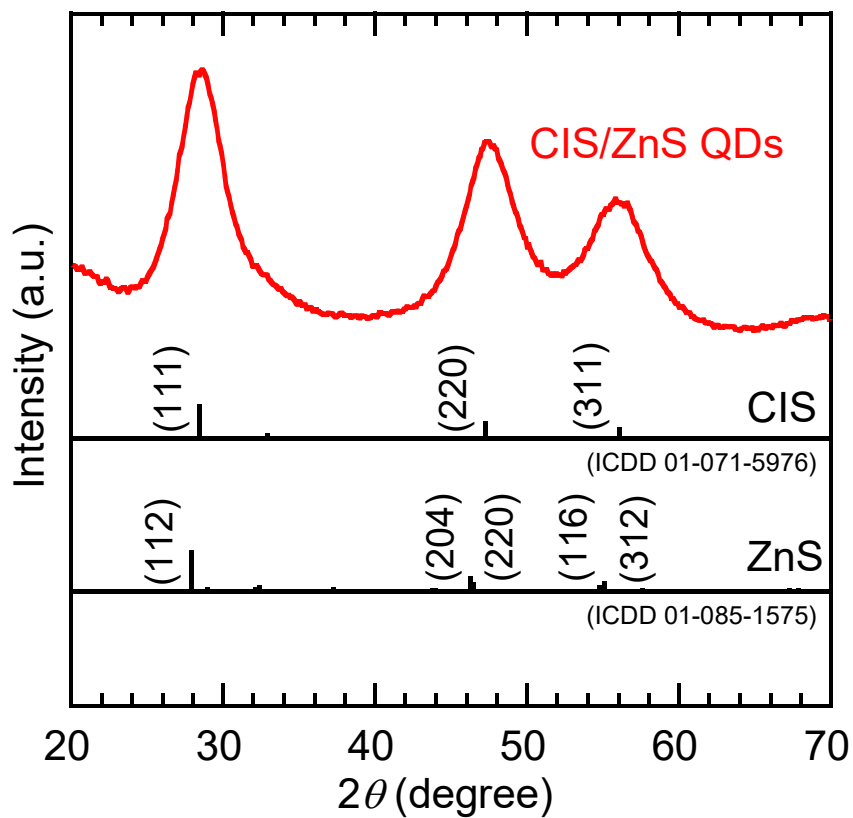

Fig. S4 XRD profile of the solid CIS/ZnS QD sample. ICDD card data of chalcopyrite-type CIS (no. 01-085-1575) and sphalerite-type ZnS (no. 01-071-5976) are also shown.

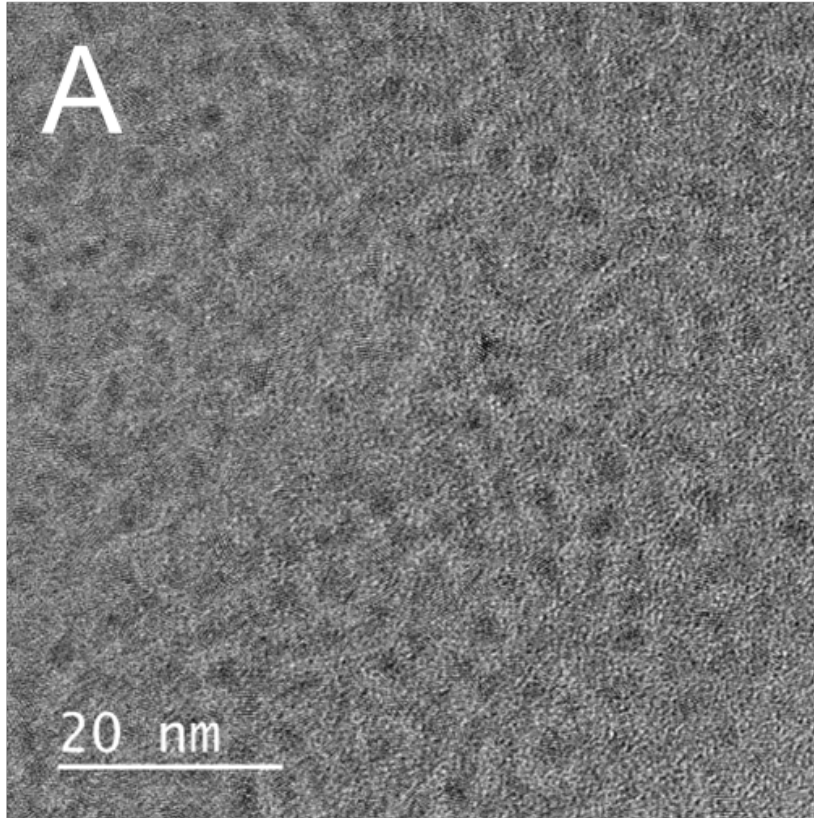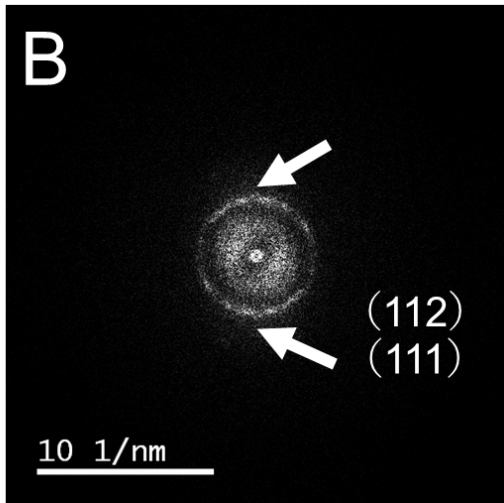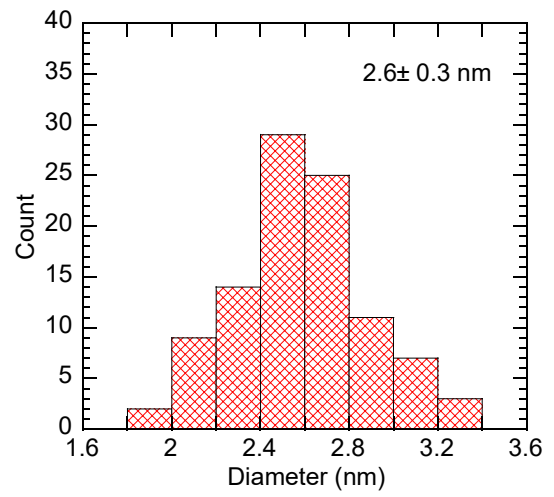

Fig. S5 (A) FE-TEM image, (B) FFT image, and (C) particle size distribution of the QDs.

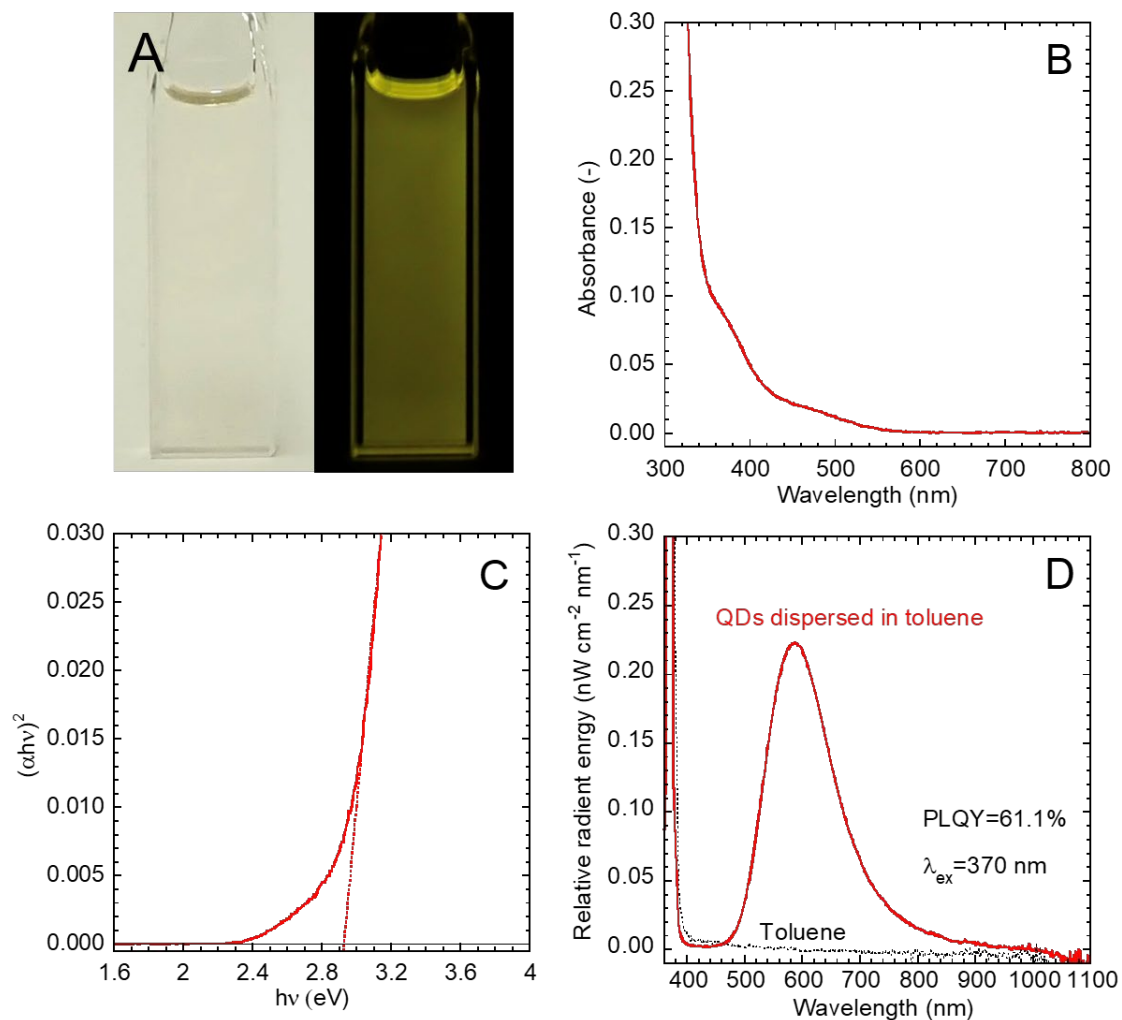

Fig. S6 (A) Photographs under white light and 365 nm UV light, (B) net UV-vis absorption spectrum, (C) corresponding Tauc plot and (D) PL spectrum for the QD dispersion in toluene. The absolute PLQY was determined from the PL spectra of the QD dispersion and blank toluene.

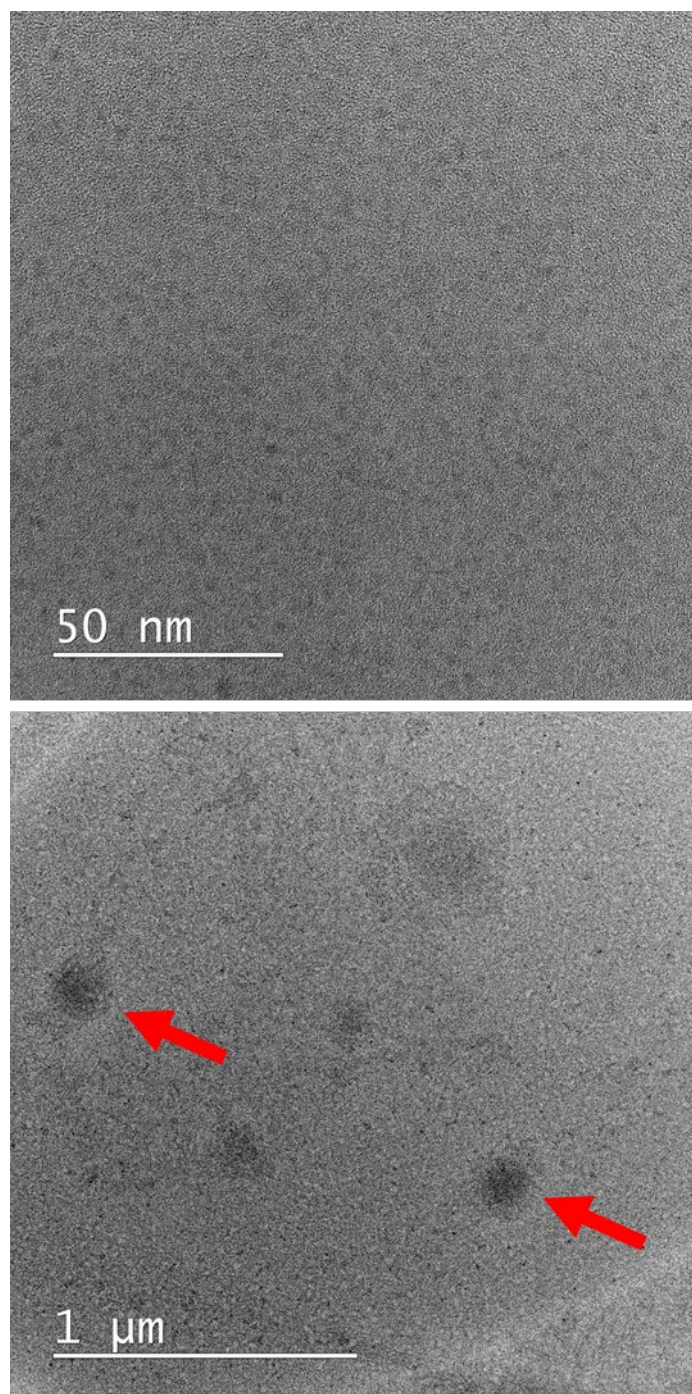

Fig. S7 FE-TEM images of QDs in QDs@EVA film with the QD concentration of 6.2 wt%. The arrows point to aggregates.



Table S1 Change in PLQY of the nanocomposite film with the QD concentration.

| Concentration | PLQY (%) |
|---------------|----------|
| 3.2 wt%       | 61.2     |
| 6.2 wt%       | 57.7     |
| 9.0 wt%       | 57.8     |
| 11.7 wt%      | 54.1     |

Table S2 Summary of the  $I$ - $V$  curve measurements shown in Fig. 3(A).

| Film sample  | $I_{sc}$ (mA) | $V_{oc}$ (V) | $FF$  |
|--------------|---------------|--------------|-------|
| Without film | 0.778         | 0.466        | 0.629 |
| Blank EVA    | 0.815         | 0.466        | 0.634 |
| 3.2 wt%      | 1.109         | 0.48         | 0.655 |
| 6.2 wt%      | 1.305         | 0.487        | 0.665 |
| 9.0 wt%      | 1.169         | 0.482        | 0.659 |
| 11.7 wt%     | 1.128         | 0.482        | 0.654 |

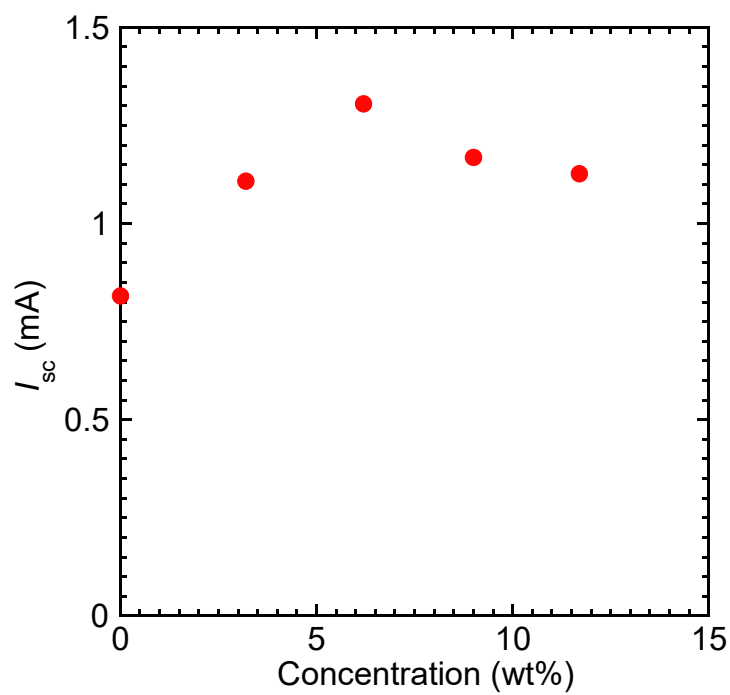

Fig. S8 Change in  $I_{sc}$  with increasing QD concentration from Fig. 3(A).

Table S3 Summary of the  $I$ - $V$  curve measurements shown in Fig. 6(A).

| Film sample       | $I_{sc}$ (mA) | $V_{oc}$ (V) | $FF$  |
|-------------------|---------------|--------------|-------|
| Without film      | 0.749         | 0.435        | 0.573 |
| Blank EVA         | 0.806         | 0.442        | 0.587 |
| 79 $\mu\text{m}$  | 1.095         | 0.463        | 0.610 |
| 164 $\mu\text{m}$ | 1.120         | 0.464        | 0.613 |
| 233 $\mu\text{m}$ | 1.199         | 0.470        | 0.636 |
| 324 $\mu\text{m}$ | 1.281         | 0.473        | 0.626 |
| 373 $\mu\text{m}$ | 1.157         | 0.472        | 0.641 |

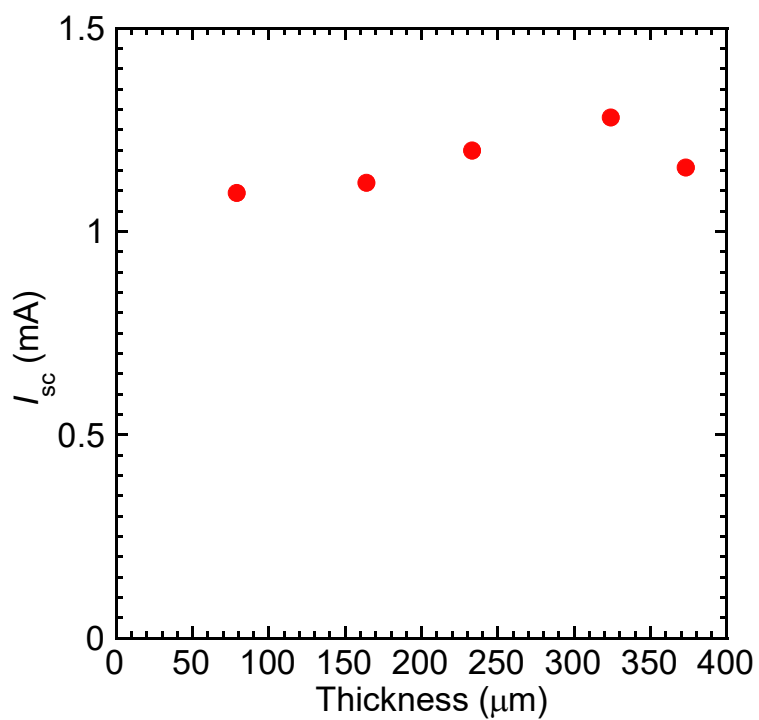

Fig. S9 Change in  $I_{sc}$  with increasing film thickness from Fig. 6(A).

Table S4 Summary of the  $I$ - $V$  curve measurements shown in Fig. 7(A).

| Light guide | Film sample           | $I_{sc}$ (mA) | $V_{oc}$ (V) | $FF$  |
|-------------|-----------------------|---------------|--------------|-------|
| Soda glass  | Blank EVA             | 0.806         | 0.442        | 0.587 |
|             | The optimized QDs@EVA | 1.281         | 0.473        | 0.626 |
| White glass | Blank EVA             | 2.651         | 0.506        | 0.664 |
|             | The optimized QDs@EVA | 5.000         | 0.535        | 0.706 |

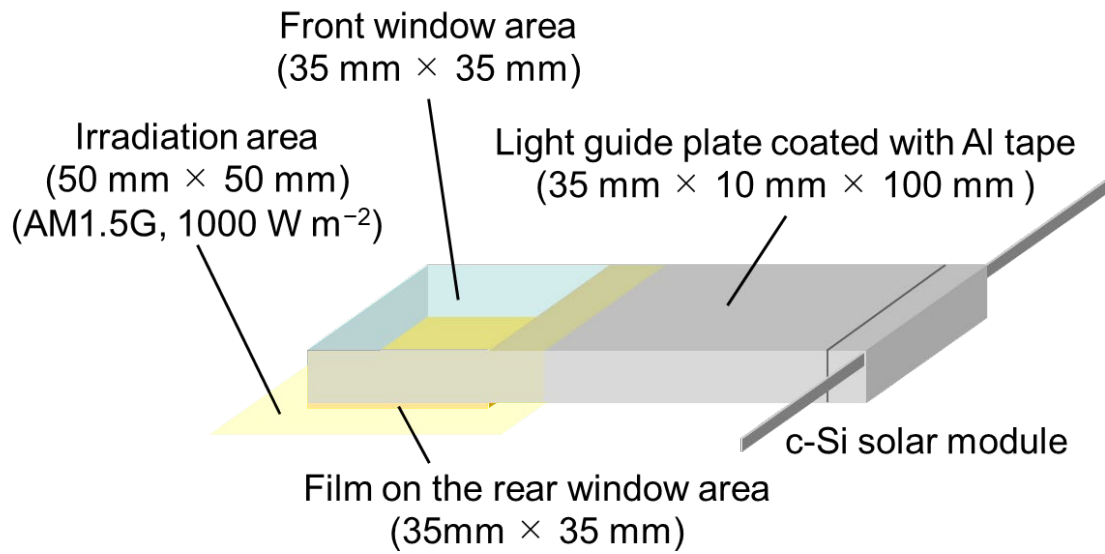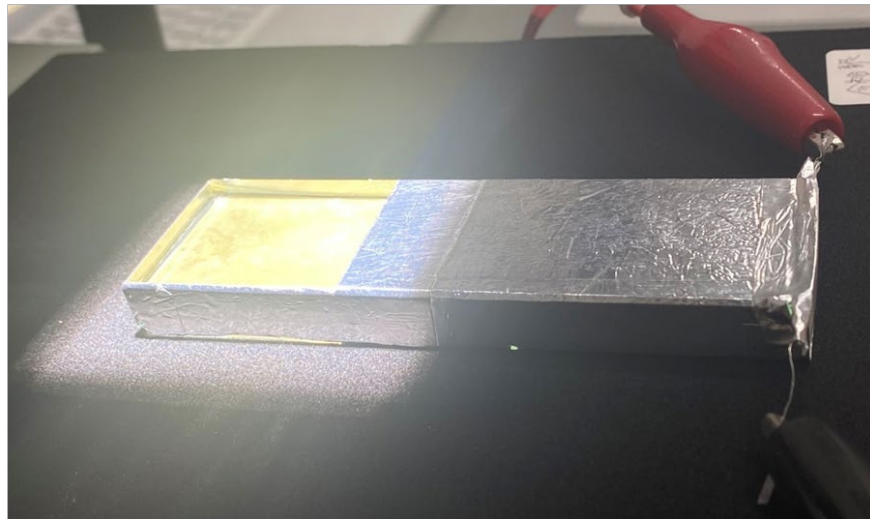

Fig. S10 Schematic illustration and photograph of the LSC which has front and rear windows. With the exception of the two windows, all areas are coated with aluminum tape. In these descriptions, a nanocomposite film is positioned on the rear side.

Table S5 Summary of the  $I$ - $V$  curve measurements shown in Fig. 8(A).

| Light guide material | Film position | $I_{sc}$ (mA) | $V_{oc}$ (V) | $FF$  |
|----------------------|---------------|---------------|--------------|-------|
| Soda glass           | Front side    | 0.614         | 0.451        | 0.628 |
|                      | Rear side     | 0.685         | 0.456        | 0.638 |
| White glass          | Front side    | 1.923         | 0.503        | 0.695 |
|                      | Rear side     | 2.006         | 0.507        | 0.698 |
